# Supplementary material for: Investigation of the soft carbon microstructure in silicon/carbon anodes for superior lithium storage
Source: Royal Society of Chemistry journal article supplement (doi:10.1039/d2ra01997c), 2022-01-01
Supplement: d2ra01997c1.pdf [file d2ra01997c1.pdf]

## **Investigation of soft carbon microstructure in silicon/carbon anodes for superior lithium storage**

Juntao Du,<sup>\*a</sup> Jiangkai Ma,<sup>ab</sup> Zetao Liu,<sup>ac</sup> Wenchao Wang,<sup>ac</sup> Huina Jia,<sup>a</sup> Minxin Zhang<sup>a</sup>  
and Yi Nie<sup>\*ad</sup>

<sup>a</sup> Zhengzhou Institute of Emerging Industrial Technology, Zhengzhou, 450000, China

<sup>b</sup> Zhengzhou University, Zhengzhou 450000, China

<sup>c</sup> Dalian University of Technology, Dalian, 116024, China

<sup>d</sup> Institute of Process Engineering, Chinese Academy of Sciences, Beijing, 100190, China

*\*Corresponding Author: [jtdu@ipezz.ac.cn](mailto:jtdu@ipezz.ac.cn) (Juntao Du); [ynie@ipe.ac.cn](mailto:ynie@ipe.ac.cn) (Yi Nie).*

Table S1. Elemental analysis of coal-based mesophase pitch.

| C (wt%) | H (wt%) | N (wt%) | S (wt%) | H/C   |
|---------|---------|---------|---------|-------|
| 95.26   | 3.80    | 0.85    | 0.16    | 0.479 |

Table S2. Typical properties of coal-based mesophase pitch.

| Solubility (wt%) |       |      | Mesophase content | Softening point |
|------------------|-------|------|-------------------|-----------------|
| TS               | TI-PS | PI   | (vol %)           | (°C)            |
| 9.9              | 19.8  | 70.3 | 100               | 260-280         |

TS, toluene soluble. TI-PS, toluene insoluble-pyridine soluble. PI, pyridine insoluble.

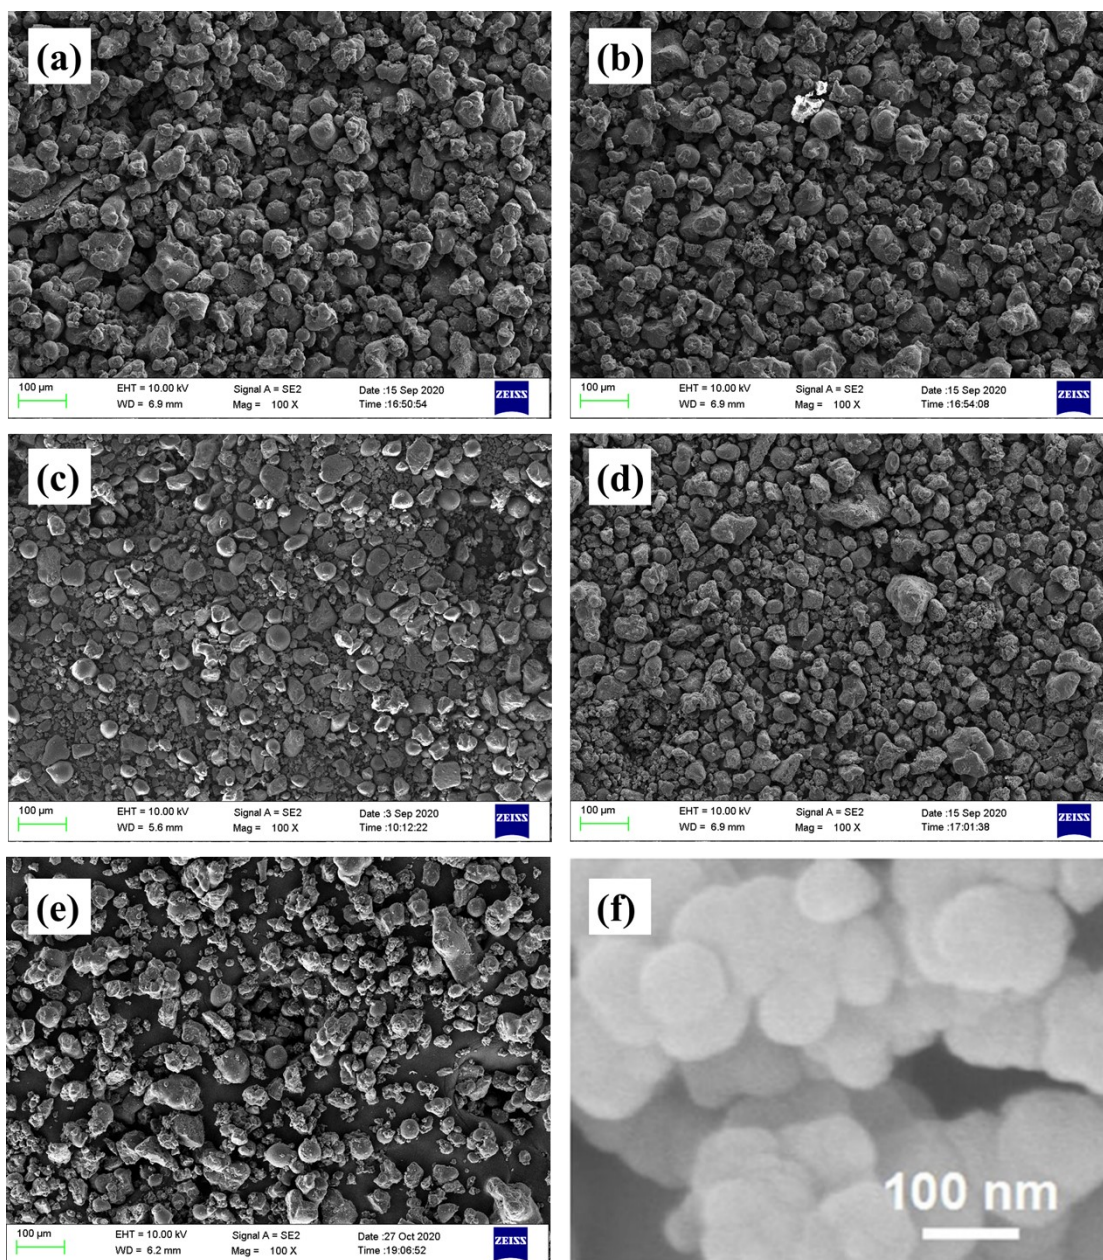

Fig.S1. SEM images of Si@MCMB-8 (a), Si@MCMB-10 (b), Si@MCMB-12 (c),

Si@MCMB-13 (d), MCMB-12 (e), Nano-Si (f).

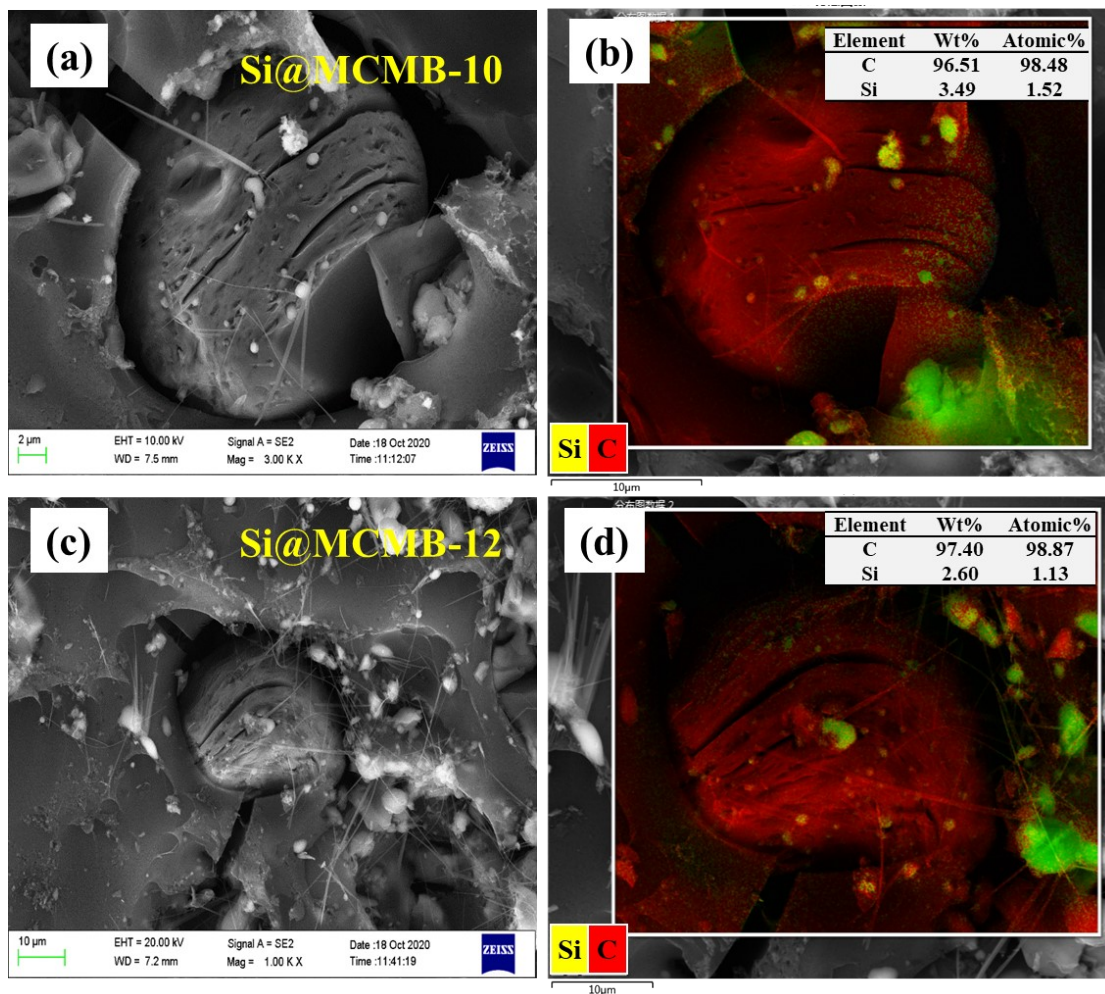

Fig.S2. SEM image (a, c) and EDS-mapping (b, d) of the cross sections of Si@MCMB-10 and Si@MCMB-12 composites. The inset in the EDS image shows the contents of Si and C in the Si@MCMB cross-section estimated by EDS.

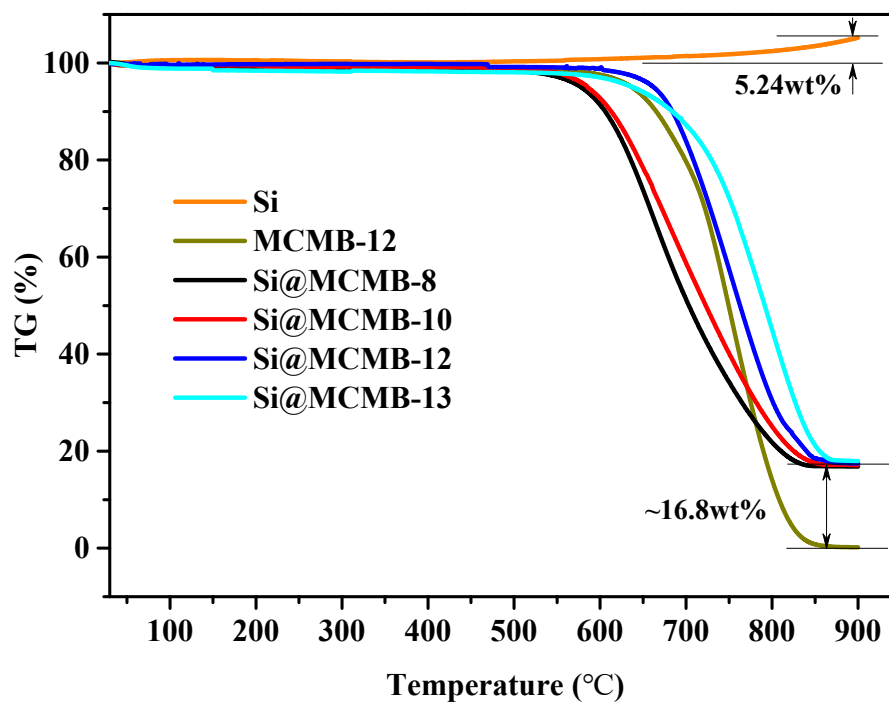

Fig.S3 Thermogravimetric analysis curve of Si@MCMB composites. The actual Si content was determined by TG analysis.

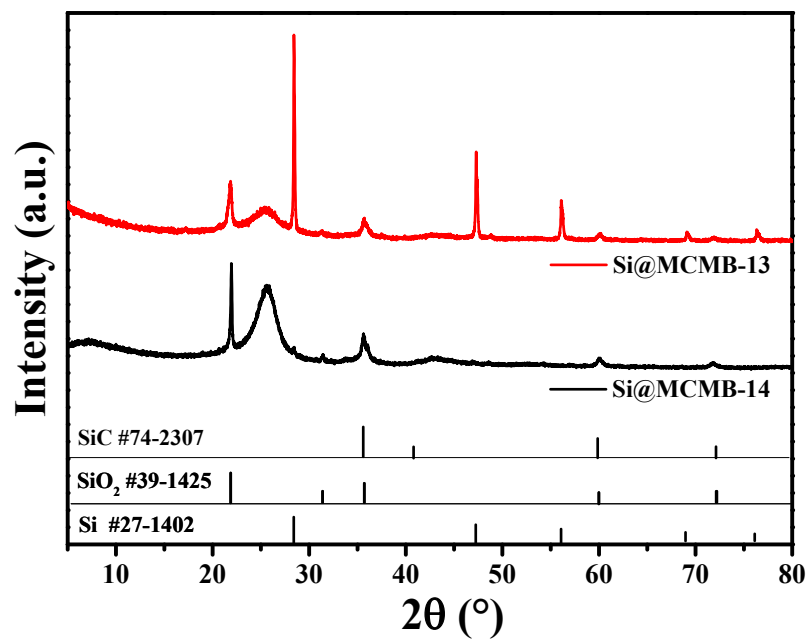

Fig.S4 XRD patterns of Si@MCMB-13 and Si@MCMB-14 composites

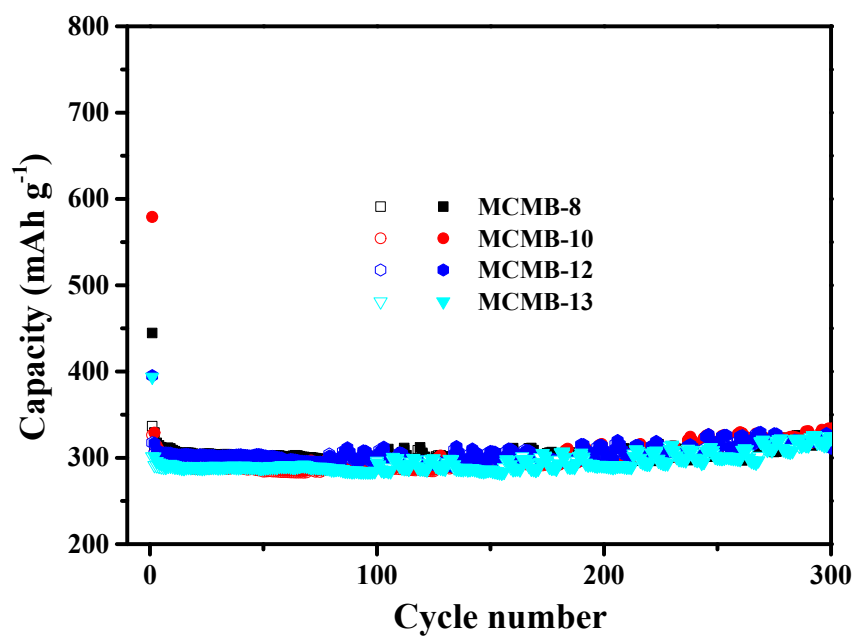

Fig.S5 Cycling performances of MCMBs at 0.2 Ag<sup>-1</sup>.



Table S3. Electrochemical performance data of MCMBs.

| MCMB samples                                 | 800   | 1000  | 1200  | 1300  |
|----------------------------------------------|-------|-------|-------|-------|
| Reversible capacity (mAh g <sup>-1</sup> )   | 366.8 | 317.4 | 301.5 | 296.3 |
| Irreversible capacity (mAh g <sup>-1</sup> ) | 126.1 | 100.6 | 92.2  | 88.2  |
| ICE (%)                                      | 74.42 | 75.93 | 76.59 | 77.07 |

Table S4. Electrochemical performance data of MCMB and Si@MCMB anodes.

| Samples    | $R_e(\Omega)$ | $R_{ct}(\Omega)$ | $W(\Omega)$ |
|------------|---------------|------------------|-------------|
| MCMB-12    | 2.94          | 27.36            | 22.68       |
| Si@MCMB-8  | 3.02          | 34.01            | 4.49        |
| Si@MCMB-10 | 4.89          | 42.9             | 29.12       |
| Si@MCMB-12 | 2.99          | 73.67            | 76.96       |
| Si@MCMB-13 | 3.63          | 80.92            | 82.1        |
| Si         | 5.26          | 100.7            | 140.8       |
